# Supplementary material for: General fabrication of mesoporous Nb2O5 nanobelts for lithium ion battery anodes
Source: Royal Society of Chemistry journal article supplement (doi:10.1039/c6ra19425g), 2016-01-01
Supplement: c6ra19425g1.pdf [file c6ra19425g1.pdf]

*Supporting information*

**General Fabrication of Mesoporous Nb<sub>2</sub>O<sub>5</sub> Nanobelts for Lithium  
Ion Battery Anode**

Chao Huang <sup>a</sup>, Jijiang Fu <sup>a</sup>, Hao Song <sup>a</sup>, Xiaofang Li <sup>a</sup>, Xiang Peng <sup>b</sup>, Biao Gao <sup>a\*</sup>,  
Xuming Zhang <sup>a\*</sup>, Paul K. Chu <sup>b</sup>

<sup>a</sup> *The State Key Laboratory of Refractories and Metallurgy, Wuhan University of  
Science and Technology, Wuhan 430081, China*

<sup>b</sup> *Department of Materials Science and Physics, City University of Hong Kong, Tat  
Chee Avenue, Kowloon, Hong Kong, China*

\*Corresponding authors:

xumzhang@wust.edu.cn (X.M. Zhang); gaobiao@wust.edu.cn (B. Gao)

The calculation of theoretical capacity of Nb<sub>2</sub>O<sub>5</sub>:

The electrochemical reaction of Li ions intercalation/deintercalation process can be expressed as follow:<sup>1, 2</sup>

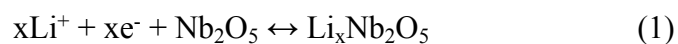

The maximum value of x in this formula is 4 according to the typical redox couple of Nb<sup>5+</sup>/Nb<sup>3+</sup>.<sup>1,2</sup> Thus, the theoretical capacity for 1 mol Nb<sub>2</sub>O<sub>5</sub> can be calculated as follow:<sup>3</sup>

$$1 \text{ mA h} = 3.6 \text{ C} \quad (2)$$

$$C_{(\text{mAh g}^{-1})} = n \times F / 3.6 / M_{(\text{Nb}_2\text{O}_5)} = 4 \times 96485 / 3.6 / 265.8 = 403.3 \text{ mAh g}^{-1} \quad (3)$$

Where  $C_{(\text{mAh g}^{-1})}$  is theoretical capacity,  $F$  is Faraday's constant,  $n$  is the valence charge, and  $M_{(\text{Nb}_2\text{O}_5)}$  is the atomic mass of Nb<sub>2</sub>O<sub>5</sub>. By calculation, the theoretical capacity should be 403 mAh g<sup>-1</sup>.

## Structural characterization and discussion

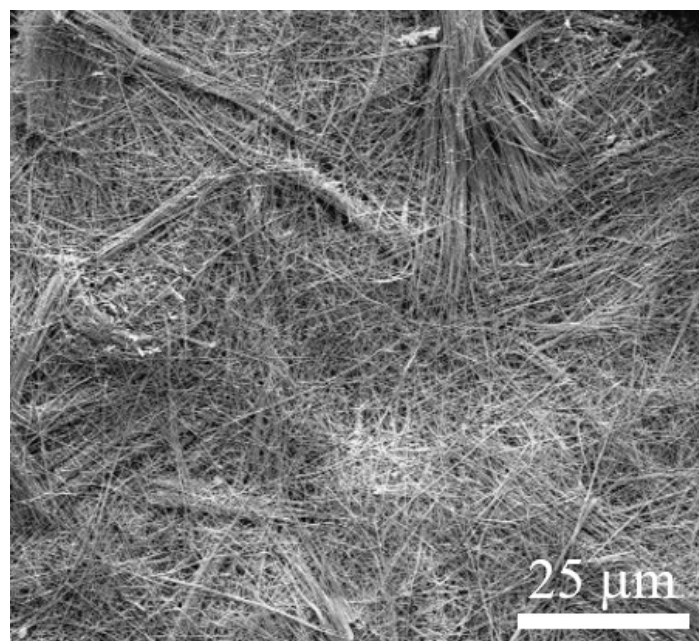

Fig. S1. SEM image of the solid T-Nb<sub>2</sub>O<sub>5</sub>NBs.

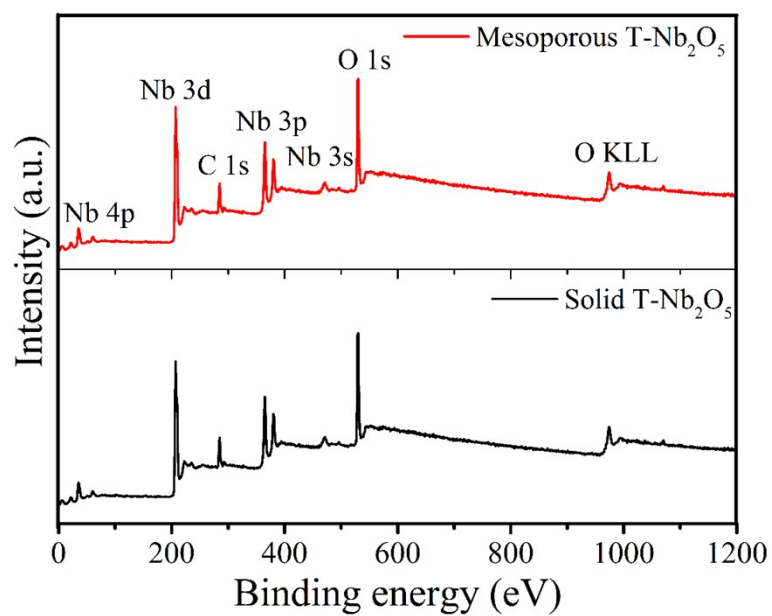

Fig. S2. Full-scan XPS spectra of mesoporous T-Nb<sub>2</sub>O<sub>5</sub> and solid T-Nb<sub>2</sub>O<sub>5</sub> NBs in the region from 10 to 1200 eV.

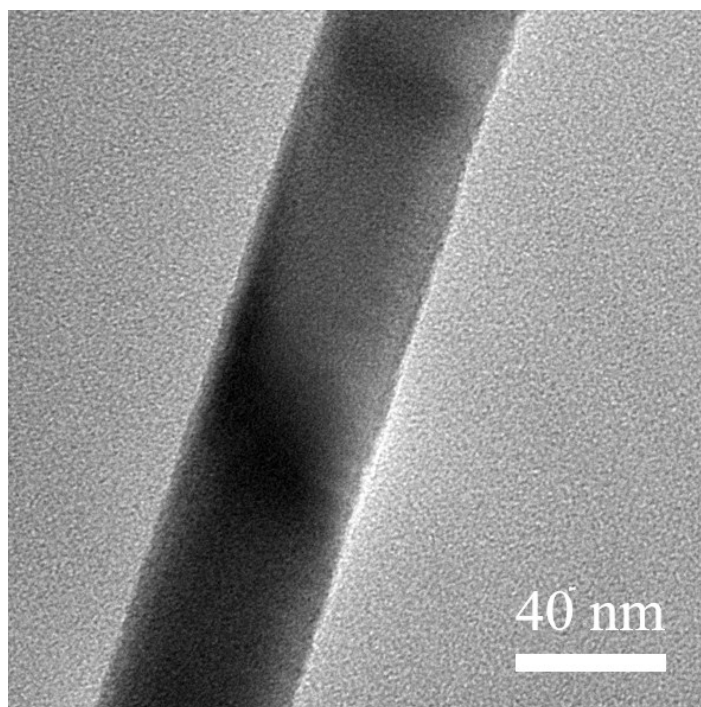

Fig. S3. TEM image of the solid T-Nb<sub>2</sub>O<sub>5</sub> NBs.

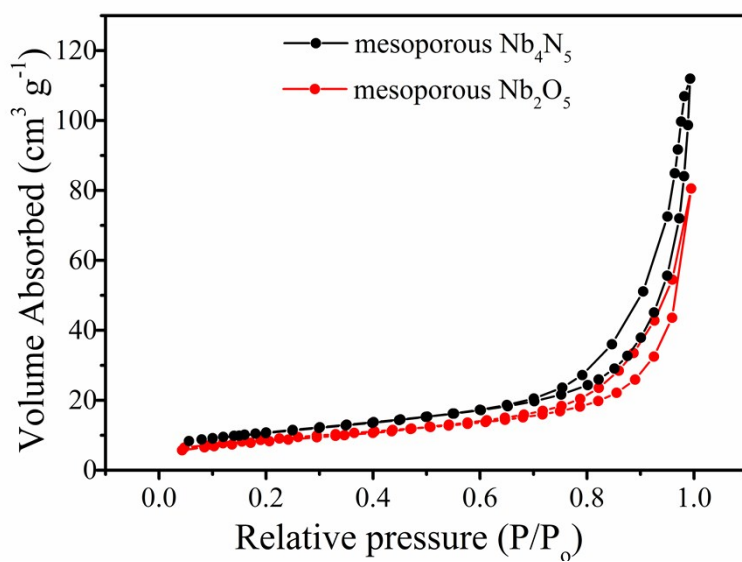

Fig. S4. N<sub>2</sub> adsorption-desorption isotherm of the mesoporous T-Nb<sub>2</sub>O<sub>5</sub> NBs and Nb<sub>4</sub>N<sub>5</sub> NBs

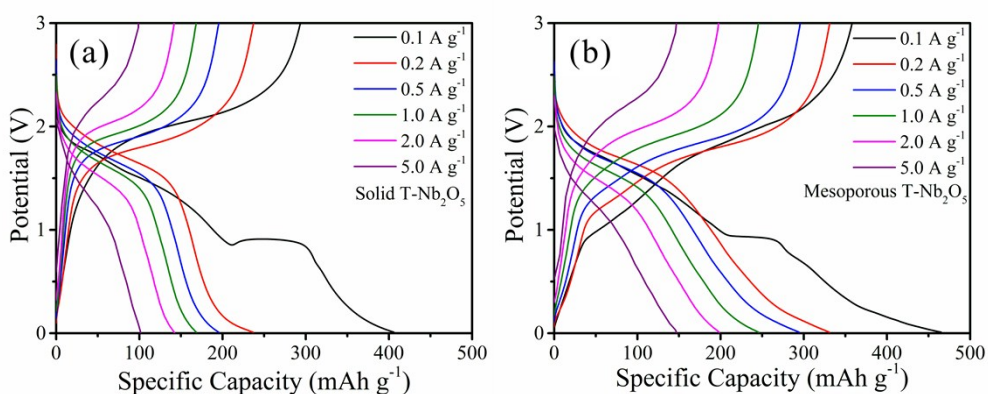

Fig. S5 The GCD curves of the electrodes of (a) solid T-Nb<sub>2</sub>O<sub>5</sub> NBs and (b) mesoporous T-Nb<sub>2</sub>O<sub>5</sub> NBs at different current densities from 0.1 A g<sup>-1</sup> to 5.0 A g<sup>-1</sup>.

#### References:

1. X. Wang, C. Yan, J. Yan, A. Sumboja and P.S. Lee, *Nano Energy*, 2015, **11**, 765-772.
2. H.Y. Lu, K.X. Xiang, N.B. Bai, W. Zhou, S.L. Wang and H. Chen, *Mater. Lett.*, 2016, **167**, 106-108.
3. J. Chen, L. Xu, W. Li and X. Gou, *Adv. Mater.*, 2005, **17**, 582-586.
